# Supplementary material for: A novel polytriazole-based organogel formed by the effects of copper ions
Source: Royal Society of Chemistry journal article supplement (doi:10.1039/c3py00227f), 2013-01-01
Supplement: c3py00227f.pdf [file c3py00227f.pdf]

## Supporting Information for

# A Novel Polytriazole-based Organogel Formed by the Effects of Copper Ions

*Key Laboratory for Specially Functional Polymeric Materials and Related  
Technology of the Ministry of Education,  
School of Materials Science and Engineering,  
East China University of Science and Technology,  
130 Meilong Road, Shanghai 200237, P. R. China  
E-mail: [fhuanlab@ecust.edu.cn](mailto:fhuanlab@ecust.edu.cn)*

## **EXPERIMENTAL DETAILS** *Raw Materials*

4,4'-diamino diphenylmethane, sodium nitrite, sodium azide, DMF and DMSO (all of chemical purity), HCl, EDTA, triphenylphosphine and copper bromide (CuBr<sub>2</sub>) (all of analytical reagent grade) were purchased from Sinopharm Chemical Reagent Co. Ltd and used as received.

## **Instrumentation**

Proton nuclear magnetic resonance (<sup>1</sup>H NMR) spectra were obtained in deuterium chloroform solvent on a BRUKER Avance500 (500 MHz, BRUKER, DE) instrument, employing tetramethylsilane (TMS) as an internal standard. FTIR spectra were recorded with a Nicolet 550 (TA, U.S.) infrared spectrometer. Rheological behavior was analysed using a RheoStress RS600 Rheometer (HAAKE, DE.). Differential scanning calorimetry (DSC) was carried out on a TA Q2000 (TA, U.S.) analyzer under nitrogen atmosphere at the heating rate of 10°C/min. Gel permeation chromatography (GPC) was carried out on Wyatt Technology Corporation Waters 515 (Wyatt Technology Corp., U.S.). DMF was used as the solvent. Scanning electron

microscope (SEM) analysis was performed on JSM-6360LV (JEOL, JP).

### ***Preparation of Polytriazole (PTA) Gels***

#### *Synthesis of 4, 4'-Diazido diphenylmethane (A)*<sup>[1-2]</sup>

4,4'-diamino diphenylmethane (5.94 g, 0.03 mol), deionized water (210 mL), and concentrated HCl (120 mL) were added into a four-neck bottomed flask (1000 mL) with a mechanical stirring bar. When the reaction flask was cooled to 0°C in an ice bath, the sodium nitrite (6.18 g, 0.09mol) dissolved in deionized water (90 mL) was dropwise added into the flask. With the reaction processing, the mixture solution became homogeneous and converted into a dark brown one. After being stirred for 1 h, the reactant was cooled to 0°C again. The sodium azide (4.86 g, 0.075mol) in deionized water (90 mL) was added dropwise into the reaction system. Evolution of nitrogen gas was observed during this reaction process. After continuously stirring for 6 hours and waiting for 12 hours, we could get the brown solid product (A1), which was dried under vacuum, by washing up the precipitate with deionized water. The structure of the diazide was shown in Scheme S1. Yield: 87%, mp: 40~42°C (41~42°C, reported[11]), <sup>1</sup>H NMR(CDCl<sub>3</sub>, TMS) δ: 7.18 (d, 4H, H<sub>a</sub>), 6.98 (d, 4H, H<sub>b</sub>), 3.97 (s, 2H, H<sub>c</sub>), FT-IR(KBr, ν, cm<sup>-1</sup>): 2089 (-N<sub>3</sub>), 1468, 2926(-CH<sub>2</sub>-); Elemental analysis for C<sub>13</sub>H<sub>10</sub>N<sub>6</sub>, Found (Calcd) (%): C 33.19 (33.60), C 62.59 (62.40), H 3.83 (4.00).

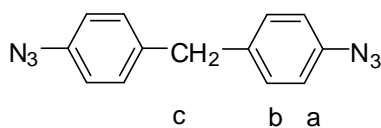

4,4'-Diazido diphenylmethane(A)

### Scheme S1. The structure of the diazide

#### *Synthesis of dipropargyl bisphenol A (B)*<sup>[3]</sup>

Dipropargyl bisphenol A was synthesized according to the literature [12] (Scheme S2).

Yield: 70%. m.p. 79~80°C; <sup>1</sup>H-NMR(CDCl<sub>3</sub>, TMS) δ: 1.62 (s, 6H, -CH<sub>3</sub>), 2.50 (tr, 2H, ≡CH), 4.65 (d, 4H, -CH<sub>2</sub>), 6.86 (m, 4H, -O-Ar-H), 7.15 (m, 4H, -C-Ar-H); FT-IR (KBr): 3286cm<sup>-1</sup>, 3260cm<sup>-1</sup>(≡CH), 2110cm<sup>-1</sup>(C≡C); Elemental analysis for C<sub>21</sub>H<sub>20</sub>O<sub>2</sub>, Found (Calcd) (%): C 82.19 (82.87), H 6.63 (6.62), O 11.18 (10.51).

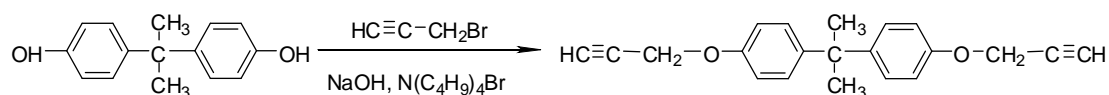

#### Scheme S2. Synthesis of bispropargyl ether of bisphenol-A (BPEBA)

#### *Synthesis of Cu(PPh<sub>3</sub>)<sub>3</sub>Br*<sup>[4]</sup>

The Cu(I) complex, Cu(PPh<sub>3</sub>)<sub>3</sub>Br, was prepared using a previously published method [13]. Cu(PPh<sub>3</sub>)<sub>3</sub>Br: yield 87%, mp.: 168~170°C. <sup>1</sup>H NMR (400 MHz, CDCl<sub>3</sub>, δ, ppm): 7.24-7.33 (m, Ph(*meta*, *ortho*), 36H), 7.33-7.40 (m, Ph(*para*), 9H).

#### *Formation of polytriazole gels*

The synthesis of new polymeric organogel (GelT) prepared by 'click' chemistry is described as Scheme 3. A (0.250g, 1 mmol) and B (0.304g, 1 mmol) was dissolved in DMF or DMSO (10.526g, 5% wt), and then Cu(PPh<sub>3</sub>)<sub>3</sub>Br (0.035g, 2% M) was added. After 48h heating at 60°C, GelT was formed. Other gels were prepared as the same way except that CuSO<sub>4</sub>/sodium ascorbate (0.025g, 0.04g, 2% M), CuBr (0.006g, 2% M) and CuI (0.008g, 2% M) substituted Cu(PPh<sub>3</sub>)<sub>3</sub>Br (0.035g, 2% M) as catalyst,

respectively. Finally, the reactions all formed polytriazole gels in DMF or DMSO with  $\text{Cu}(\text{PPh}_3)_3\text{Br}$ ,  $\text{CuSO}_4/\text{sodium ascorbate}$ ,  $\text{CuBr}$  and  $\text{CuI}$  as catalysts. It indicates that diverse  $\text{Cu(I)}$  source all have the ability to form gel in this reaction.

## SUPPORTING RESULTS

### *FTIR Analysis.*

GelT was illustrated by FTIR (Fig. S1). Absorption peaks of  $\equiv\text{CH}$  ( $3290\text{cm}^{-1}$ ) and  $-\text{N}_3$ ,  $\text{C}\equiv\text{C}$  ( $2110\text{cm}^{-1}$ ) disappear in the gel. The peaks at  $3130\text{cm}^{-1}$  which is assigned to C-H in the triazole ring occurs in the polytriazole gel. It indicates that the reaction between the azide and alkyne groups has taken place and the poly(1,2,3-triazole) has been formed.

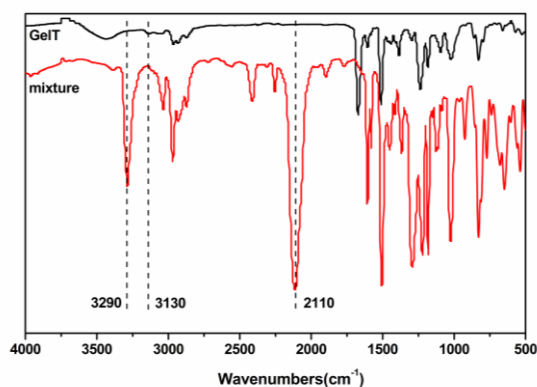

Figure S1. FTIR spectra of polytriazole gel

### *Rheology experiments*

In order to expose the gel nature of GelT, rheology measurements including Dynamic Time Sweep (DTS), Dynamic Frequency Sweep (DFS), and Dynamic Strain Sweep (DSS) were carried out.

The following three experiments were carried out for GelT:

a. Dynamic Time Sweep (DTS): plot of storage modulus ( $G'$ , elastic component) and loss modulus ( $G''$ , viscous component) with time. In this experiment the strain (1%) and the frequency (1Hz) were kept constant. The magnitude of  $G'$  is an indication of the extent of cross-linking leading to material rigidity. The material is considered a gel if  $G' > G''$ .

b. Dynamic Frequency Sweep (DFS): plot of  $G'$  and  $G''$  with frequency (0.01 to 100 Hz), performed to make sure that the frequency used in DTS is within the linear viscoelastic regime. The results show that the gels here are viscoelastic for frequencies ranging from 0.01 to 100 Hz; we chose 1 Hz for DTS.

c. Dynamic Strain Sweep (DSS): plot of  $G'$  and  $G''$  with strain (from 0.01 to 100%), performed to make sure that the strain used in DTS is within the linear viscoelastic regime. The results show that the gels here fracture at slightly less than 2% strain; we used 1% strain for DTS.

## REFERENCES

- [1] Paul R. Serwinski and Paul M. Lahti, *Org. Lett.*, 2003, 5(12), 2099-2102
- [2] Jason R. Thomas, Xianjun Liu, and Paul J. Hergenrother, *J. Am. Chem. Soc.*, 2005, 127, 12434-12435
- [3] Yanhong Hu, Yonghong Luo, Liqiang Wan, Huiming Qi, Farong Huang, Lei Du, *Acta Polymerica Sinica*, 2005, 1(4), 560-565
- [4] Rattan Gujadhur, D. Venkataraman, Jeremy T. Kintigh, *Tetrahedron Letters*, 2001, 42, 4791-4793
